# Supplementary material
Source: PubMed Central journal article supplement (PMC1599974)

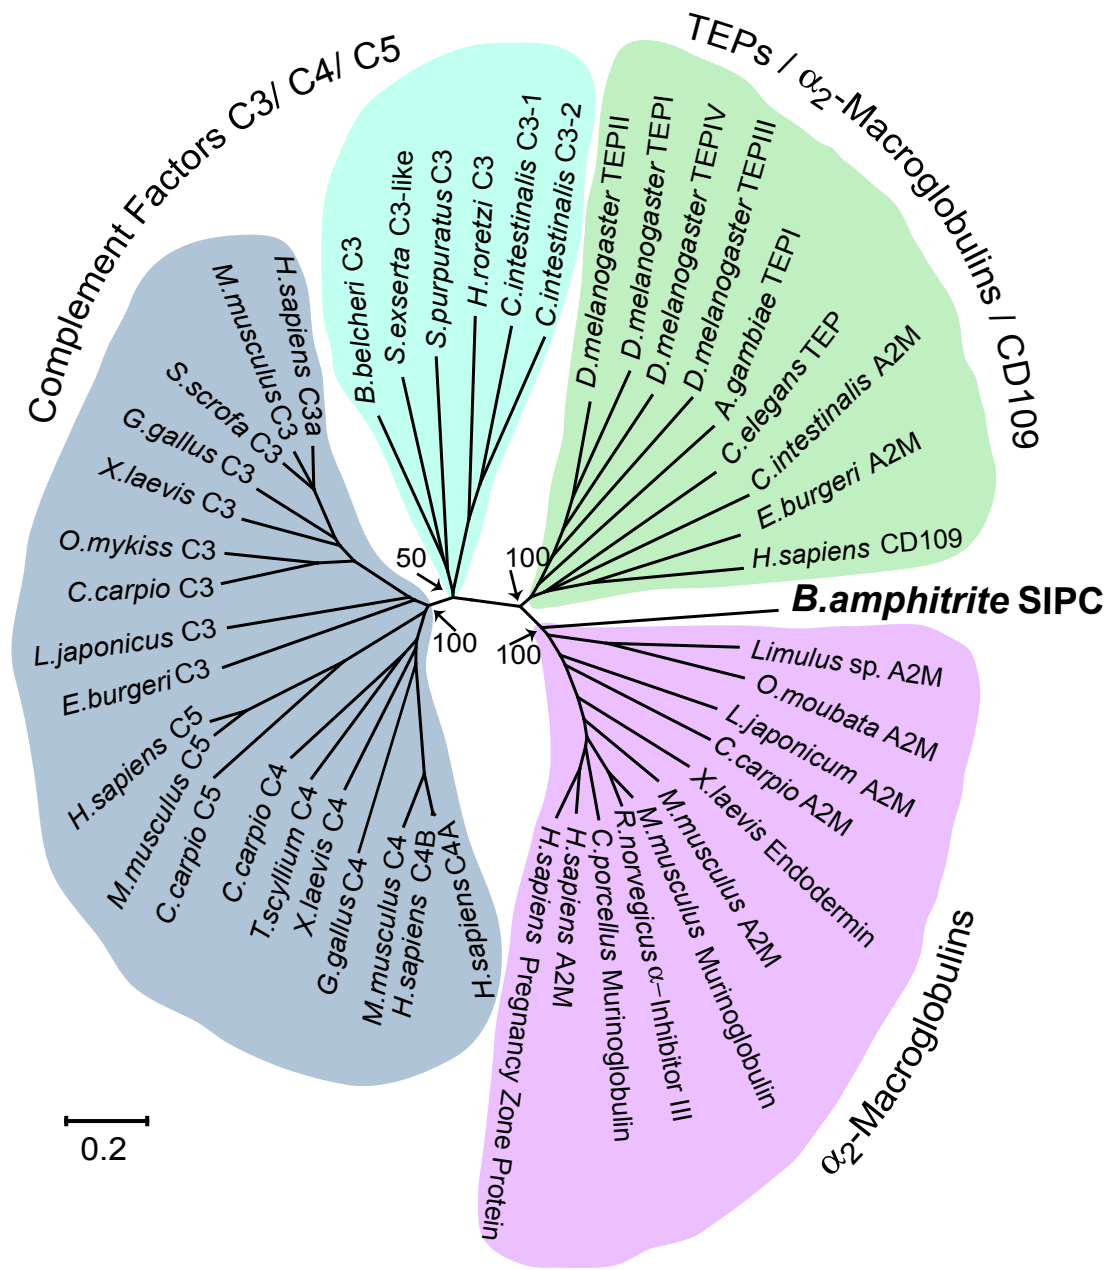

Supplement: pnas_0602763103_2.pdf [file pnas_0602763103_2.pdf]
